# Supplementary material for: Energy-yield prediction for II–VI-based thin-film tandem solar cells
Source: Royal Society of Chemistry journal article supplement (doi:10.1039/c6ee01778a), 2016-01-01
Supplement: c6ee01778a1.pdf [file c6ee01778a1.pdf]

## Electronic Supplementary Information

### Energy-Yield Prediction for II-VI-based Thin-Film Tandem Solar Cells

Jonathan P. Mailoa<sup>1,3\*</sup>, Mitchel Lee<sup>2</sup>, Ian M. Peters<sup>3</sup>, Tonio Buonassisi<sup>3</sup>, Alex Panchula<sup>2</sup>, Dirk N. Weiss<sup>1\*</sup>

<sup>1</sup> First Solar, Inc., 1035 Walsh Avenue, Santa Clara, California 95050, USA

<sup>2</sup> First Solar, Inc., 135 Main Street, San Francisco, California 94105, USA

<sup>3</sup> Massachusetts Institute of Technology, 77 Massachusetts Avenue, Cambridge, Massachusetts 02139, USA

\*Corresponding authors: [jpmailoa@alum.mit.edu](mailto:jpmailoa@alum.mit.edu), [dirk.weiss@firstsolar.com](mailto:dirk.weiss@firstsolar.com)

### Tandem Radiative Efficiency Limit with One-Diode Model

In this ideal optical model, photons with  $E_{\text{ph}} > E_{\text{g,top}}$  are fully absorbed and collected by the top cell while the remaining light with  $E_{\text{g,top}} > E_{\text{ph}} > E_{\text{g,bot}}$  is fully absorbed and collected by the bottom cell.  $E_{\text{ph}}$  is the photon energy, while  $E_{\text{g,top}}$  and  $E_{\text{g,bot}}$  are the top and the bottom cell  $E_{\text{g}}$ , respectively.<sup>1,2</sup> The luminescent coupling among the sub-cells is neglected because the effect on sub-cell current density is small, as has been previously shown.<sup>1</sup> The one-diode models used to calculate the  $J$ - $V$  curves are adopted from the literature.<sup>1,3</sup> We assume that the recombination mechanism in a solar cell with known  $E_{\text{g}}$  is radiatively-limited:

$$J_{\text{dark}}(V) = J_{0,\text{SQ}}(\exp(qV/kT) - 1) \quad (1)$$

$$J_{0,\text{SQ}} = 2q \int_{\frac{qE_{\text{g}}}{h}}^{\infty} \frac{2\pi\nu^2}{c^2(\exp(h\nu/kT)-1)} d\nu \quad (2)$$

where  $J_{\text{dark}}$  is the dark current,  $V$  is the operating voltage,  $J_{0,\text{SQ}}$  is the radiative dark current given by the detailed-balance, or SQ limit,  $q$  is the elementary charge,  $k$  is Boltzmann's constant,  $T$  is operating

temperature at 25 °C,  $h$  is Planck's constant,  $c$  is the speed of light, and  $\nu$  is the state transition energy multiplied by  $q/h$ .<sup>1,3</sup> We can use the  $J_{0,SQ}$  to construct the sub-cell current-density-voltage  $J$ - $V$  curves:

$$J_{\text{top}}(V_{\text{top}}) = J_{\text{sc,top}} - J_{0,\text{SQ,top}}(\exp(qV_{\text{top}}/kT) - 1) \quad (3)$$

$$J_{\text{bot}}(V_{\text{bot}}) = J_{\text{sc,bot}} - J_{0,\text{SQ,bot}}(\exp(qV_{\text{bot}}/kT) - 1) \quad (4)$$

where  $J_{\text{top}}$ ,  $J_{\text{bot}}$ ,  $V_{\text{top}}$ , and  $V_{\text{bot}}$  are the current densities and operating voltage of the top and the bottom cells, respectively. The radiative efficiency limits of 4T ( $\eta_{4T}$ , independently operated sub-cells) and 2T ( $\eta_{2T}$ , series-connected sub-cells) tandems are then calculated using the formulae:

$$\eta_{4T} = \left( \max(J_{\text{top}}V_{\text{top}}) + \max(J_{\text{bot}}V_{\text{bot}}) \right) / P_{\text{in}} \quad (5)$$

$$\eta_{2T} = \max \left( J \left( V_{\text{top}}(J) + V_{\text{bot}}(J) \right) \right) / P_{\text{in}} \quad (6)$$

where  $P_{\text{in}}$  is the incident sunlight power under AM1.5G.

## Energy-Yield Model 3 Validation using Published GaAs-Si Tandem Device Physics Model

In order to test the validity of the semi-empirical energy-yield model (Model 3), we compare the performance of the model to a previously published energy-yield model developed by Liu et.al.<sup>4</sup> The same optical stack (layer material ( $n,k$ ) data & thicknesses) to calculate the optical absorption in the layers in the two models. Because  $EQE(\lambda)$  calculation for Model 3 is only valid for thin-film devices, the actual  $EQE(\lambda)$  for the bottom Si cell of Model 3 (FS) is taken from the PC1D device physics simulator model calculated by the MIT model.<sup>4</sup> The same annual sunlight input spectrum for Singapore is used for the two models. Apart from that, the energy-yield calculation for the semi-empirical FS model is performed independently from the MIT device physics model.<sup>4</sup> Energy-yield output comparison for the two models are shown in **Supplementary Figure 1**, showing that the semi-empirical FS model works just as well as the numerical device physics MIT model.

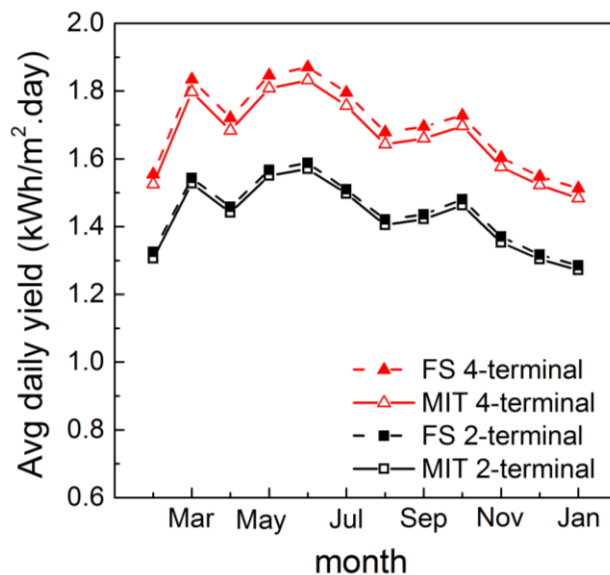

**Supplementary Figure 1.** Comparison of average daily energy yield for 4T (red triangles) and 2T (black squares) GaAs/Si tandem<sup>4</sup> solar cells under annual Singapore spectrum, modeled using PC1D device physics simulator (MIT)<sup>4</sup> and semi-empirical Model 3 of this paper (FS). There is a negligible difference of energy-yield result between the two models, but the semi-empirical model is several orders of magnitudes faster than a full-fledged device physics simulator model.

### Thin-Film Optical Modeling for Energy-Yield Model 3

Optical absorption  $A(\lambda)$  for each sub-cell is calculated using a transfer matrix method (TMM) simulation.<sup>5</sup> We use published  $(n,k)$  optical data for GaSb,<sup>6</sup> CIGS,<sup>7</sup> CdS,<sup>8</sup> ITO,<sup>5</sup> Mo,<sup>9</sup> and EVA,<sup>10</sup> while  $(n,k)$  for the remaining layers are measured by First Solar. The  $(n,k)$  profile for a hypothetical high- $E_g$  II-VI top absorber layer (only used in Architecture B) is obtained by shifting the  $(n,k)$  profile for CdTe up by 0.23 eV in the energy domain, which enables us to  $J$ -match the tandem sub-cells in Architecture B. We extract  $J_{sc}$  from the external quantum efficiency  $EQE(\lambda)$ , assuming  $EQE(\lambda) = A(\lambda)$ .

### Series and Shunt Resistance Fitting for Energy-Yield Model 3

Internal series and shunt resistance values  $R_s$  and  $R_{sh}$  of sub-cells are fitted and extracted from the literature and summarized in **Table 4**.<sup>11-13</sup> For the fitting routine we use the equations<sup>14</sup>:

$$J_0 = J_{sc,1-sun} / \left( \exp\left(\frac{qV_{oc,1-sun}}{nkT}\right) - 1 \right) \quad (7)$$

$$J(V) = J_{sc} - J_0 \left( \exp\left(\frac{q(V+J(V)R_s)}{nkT}\right) - 1 \right) - \frac{(V+J(V)R_s)}{R_{sh}} \quad (8)$$

where  $J_{sc,1-sun}$  is the calculated  $J_{sc}$  of the sub-cell under AM1.5G illumination. We note that while the  $J_0$  calculation in **Equation 7** is a simplified form that ignores  $R_s$  and  $R_{sh}$ , the resulting  $J$ - $V$  curve calculated using **Equation 8**, which includes  $R_s$  and  $R_{sh}$ , is a close fit to  $J$ - $V$  curve of the cell found in literature.

## References

- 1 A. De Vos, *J. Phys. D. Appl. Phys.*, 2000, **13**, 839–846.
- 2 A. S. Brown and M. A. Green, *Phys. E*, 2002, **14**, 96–100.
- 3 W. Shockley and H. J. Queisser, *J. Appl. Phys.*, 1961, **32**, 510.
- 4 H. Liu, Z. Ren, Z. Liu, A. G. Aberle, T. Buonassisi and I. M. Peters, *Opt. Express*, 2015, **23**, A382.
- 5 G. F. Burkhard, E. T. Hoke and M. D. McGehee, *Adv. Mater.*, 2010, **22**, 3293–3297.
- 6 S. Adachi, *J. Appl. Phys.*, 1989, **66**, 6030–6040.
- 7 P. D. Paulson, R. W. Birkmire and W. N. Shafarman, *J. Appl. Phys.*, 2003, **94**, 879–888.
- 8 S. Ninomiya and S. Adachi, *Electronics*, 1995, **78**, 1183–1190.
- 9 Sopra, *Sopra SA Database*, 2016. <http://www.sspectra.com/sopra.html>.
- 10 K. R. McIntosh, J. N. Cotsell, J. S. Cumpston, A. W. Norris, N. E. Powell and B. M. Ketola, *Proc. 34th IEEE PVSC*, 2009, 544–549.
- 11 M. Nakamura, N. Yoneyama, K. Horiguchi, Y. Iwata, K. Yamaguchi, H. Sugimoto, T. Kato, E. Solution and S. S. S. K. K, *Proc. 40th IEEE PVSC*, 2014, 0107–0110.
- 12 M. A. Green, K. Emery, Y. Hishikawa, W. Warta and E. D. Dunlop, *Prog. Photovoltaics Res. Appl.*, 2015, **23**, 1–9.
- 13 M. A. Green, K. Emery, Y. Hishikawa, W. Warta and E. D. Dunlop, *Prog. Photovolt Res. Appl.*, 2012, **20**, 606–614.
- 14 P. Würfel, *Physics of Solar Cells : From Basic Principles to Advanced concepts*, 2009.
